# Supplementary material
Source: PubMed Central journal article supplement (PMC4294602)
Supplement: supp_the2014-0175_Supplemental_Figures.pdf [file supp_the2014-0175_Supplemental_Figures.pdf]

Supplemental Figures for:  
Optimal Cut-Points for QLQ-C30 Scales: Utility for Clinical Trials and Updates of Prognostic Systems in Advanced Hepatocellular Carcinoma  
Jean-Claude Barbare et al.

**Figure S1:** Overall survival (in months) for good, intermediate and poor prognosis according to the original and modified Bobar prognostic systems. **A)** Median survival was 12.20 [10.50 – 14.53], 6.10 [4.80 – 7.30] and 3.20 [2.00 – 7.43] for good (solid line), intermediate (dash line) and poor prognosis (dotted line), respectively for the original Bobar system. **B)** Median survival was 13.10 [11.20 – 16.47], 6.50 [5.63 – 7.77] and 3.20 [2.13 – 6.00] for the good (solid line), intermediate (dash line) and poor prognostic (dotted line) respectively for the modified Bobar system.

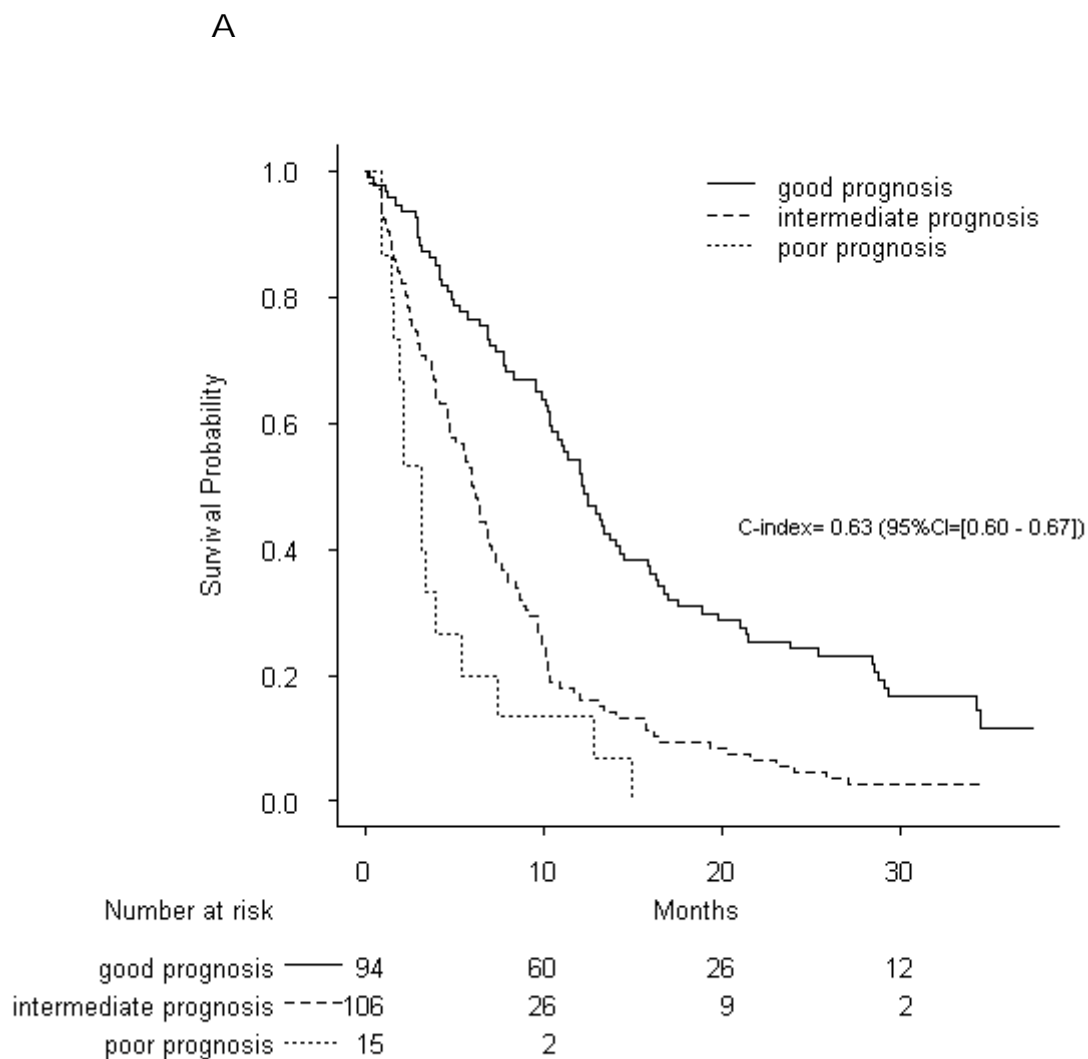

B

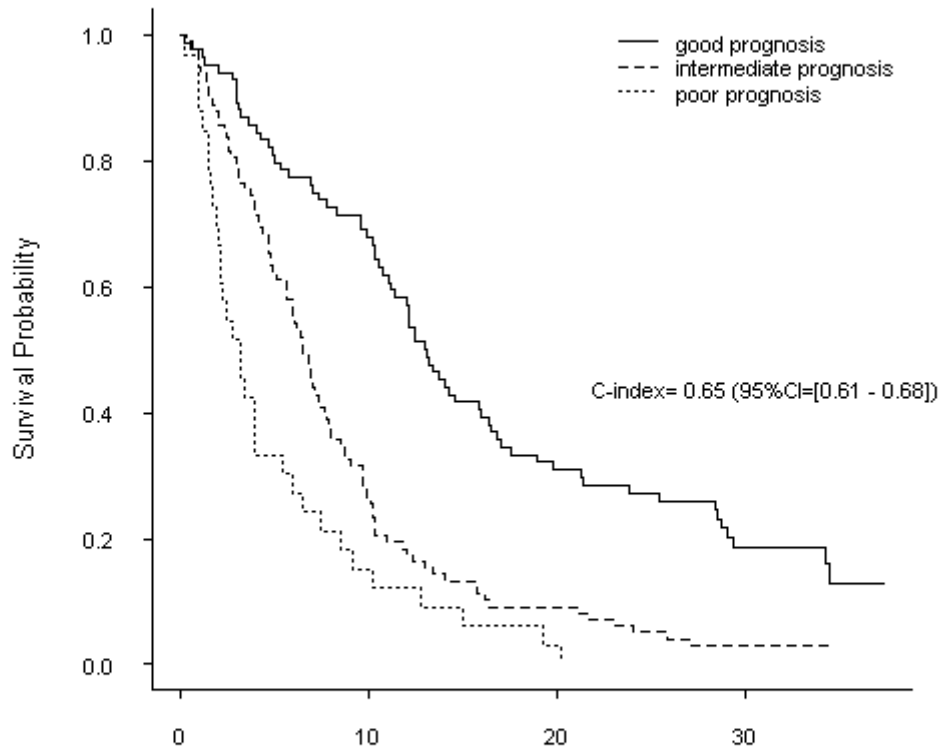

|                        | 0  | 10 | 20 | 30 |
|------------------------|----|----|----|----|
| Number at risk         |    |    |    |    |
| good prognosis         | 84 | 57 | 25 | 12 |
| intermediate prognosis | 98 | 26 | 9  | 2  |
| poor prognosis         | 33 | 5  | 1  |    |

**Figure S2:** Overall survival (in months) for good, intermediate and poor prognosis according to the original and modified GRETCH prognostic classifications. **A).** Median survival was 12.17 [10.30 – 17.60], 7.03 [6.00 – 9.07] and 2.57 [1.50 – NA] for good (solid line), intermediate (dash line) and poor prognosis (dotted line), respectively for the original GRETCH index. **B)** Median survival was 14.10 [11.10 – 29.33], 8.77 [6.87 – 10.33] and 2.97 [2.40 – 5.43] for good (solid line), intermediate (dash line) and poor prognosis (dotted line), respectively for the modified GRETCH index.

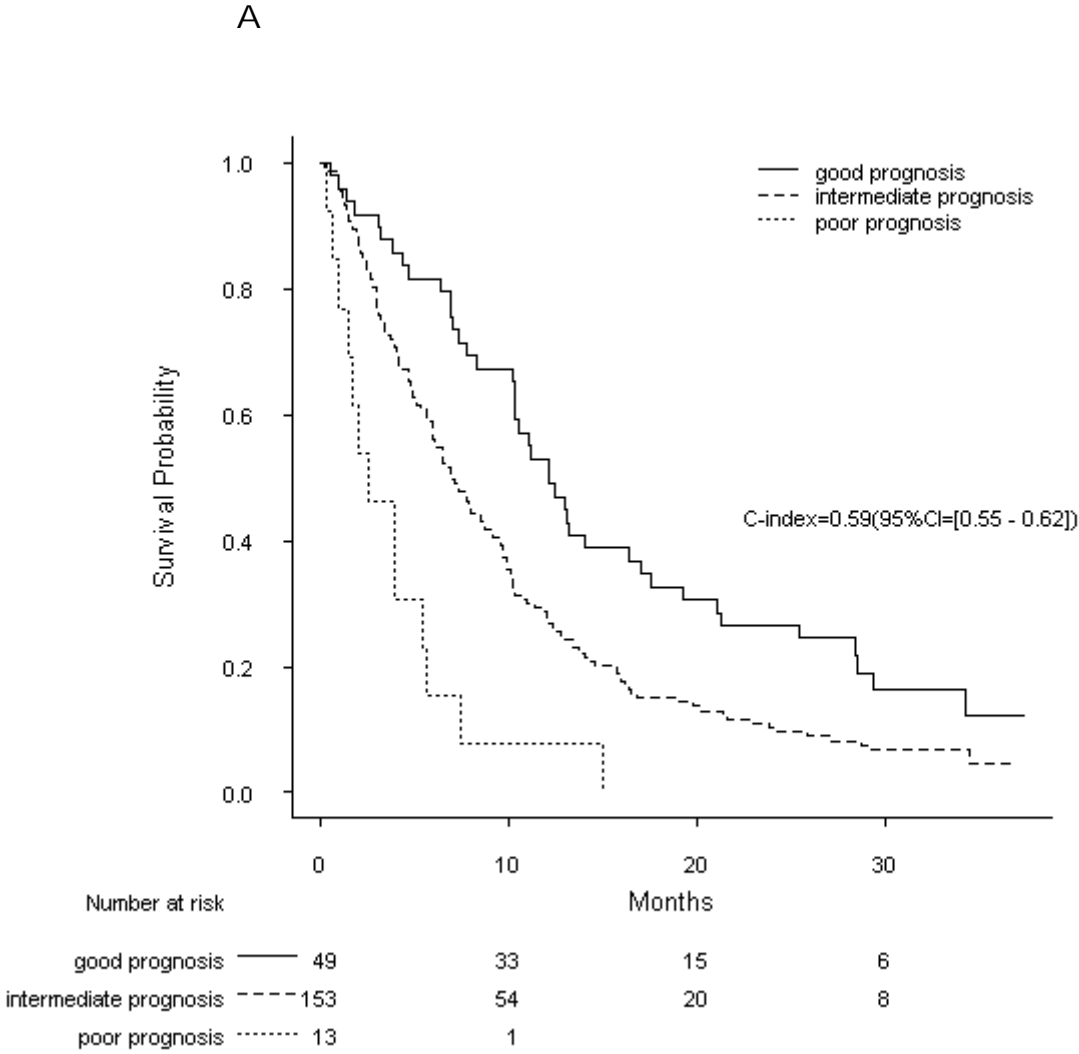

B

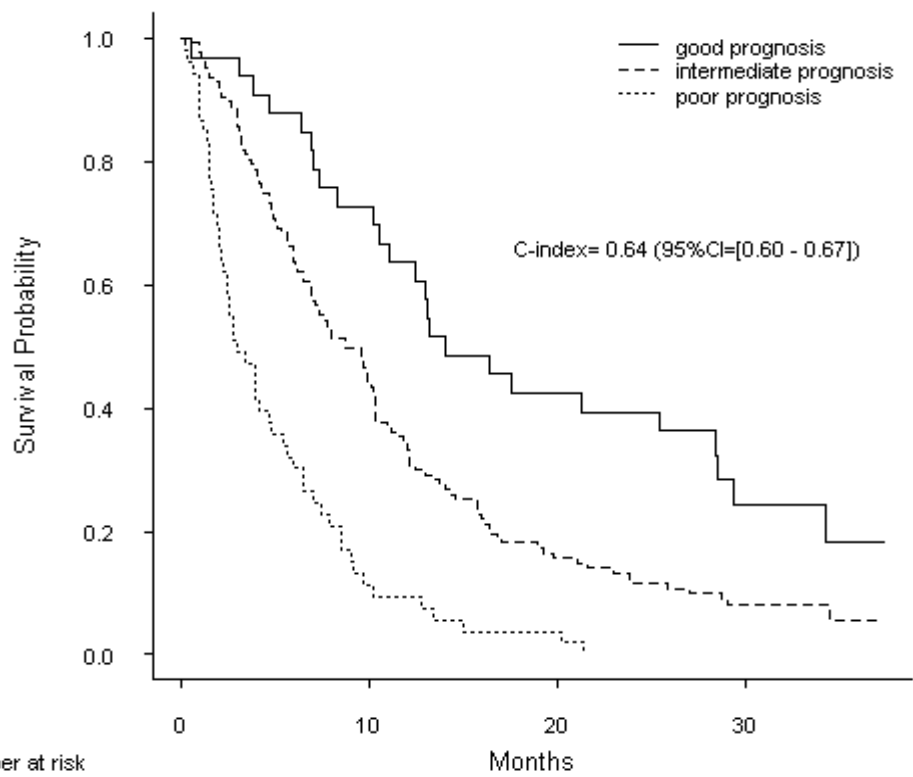

| Number at risk         | 0   | 10 | 20 | 30 |
|------------------------|-----|----|----|----|
| good prognosis         | 33  | 24 | 14 | 6  |
| intermediate prognosis | 127 | 56 | 19 | 8  |
| poor prognosis         | 53  | 6  | 2  |    |
